# Supplementary material for: The usefulness of peri-trigger female reproductive hormones (delta-FRH) in predicting oocyte maturation in normal ovarian reserve patients who received in vitro fertilization-embryo transfer: a retrospective study
Source: PeerJ journal article supplement (doi:10.7717/peerj.17706), 2024-07-11
Supplement: Raw_Data.xlsx [file Raw_Data.xlsx]

## Sheet: data
ID	Group_N	Group_R	Date_OR	Date_TRG	Age	Times_P	Times_G	Times_LC	BMI	AFC	E2_OR	P_OR	FSH_OR	LH_OR	E2_TRG	LH_TRG	P_TRG	FSH_TRG	E2_pTRG	LH_pTRG	P_pTRG	FSH_pTRG	AMH_BSE	E2_BSE	P_BSE	LH_BSE	E2_DoV1	E2_DoV2	P_DoV1	P_DoV2	LH_DoV1	LH_DoV2	E2_RoV1	E2_RoV1_c	E2_RoV2	E2_RoV2_c	P_RoV1	P_RoV1_c	P_RoV2	P_RoV2_c	FSH_BSE	FSH_RoV1	FSH_RoV1_c	FSH_RoV2	FSH_RoV2_c	LH_RoV1	LH_RoV1_c	LH_RoV2	LH_RoV2_c
2	0	0	2020-08-25	2020-08-23	25	0	0	0	25	7	1700	12.7		0.6	3020	2.9	1.73		3480	2.8	6.37		1.14	91.8	0.8	0.9	2928.2	460	0.93	4.64	2	-0.1	31.8976	2	0.152318	3	1.1625	3	2.68208	1	2.2	-1	1	1	3	-0.233333	2	18.0435	3
4	1	0	2020-02-21	2020-02-19	28	0	0	0	17.9	10					799	0.5	0.5	15.6	911	5	4.6	9.1	2.02	148	30.3	2	651	112	-29.8	4.1	-1.5	4.5	4.39865	1	0.140175	2	-0.983498	1	8.2	2	2.7	1.375	3			-0.83871	1	-1	1
5	0	0	2020-07-23	2020-07-21	28	0	0	0	18.9	10	498	3.66	7	0.3	1030	1.8	0.6	15.5	1280	10	2.74	10.5	2.02	148	30.3	2	882	250	-29.7	2.14	-0.2	8.2	5.95946	1	0.242718	3	-0.980198	1	3.56667	1	2.7	-1	1			-0.814815	1	-1	1
6	1	0	2021-10-08	2021-10-06	28	0	0	0	18.3	11	702	6.35	7.8	0.5	1780	0.3	1.04		1400	10.6	5.79	16.9	1.69	27.5	1	0.4	1752.5	-380	0.04	4.75	-0.1	10.3	63.7273	3	-0.213483	1	0.04	2	4.56731	1	2.9	0.814815	2	-0.689655	1	-0.380952	2	-0.384615	1
7	0	0	2020-11-20	2020-11-18	31	0	0	0	18.4	9	463	6.28	4	0.3	1520	1	0.49	10.2	1560	0.5	3.56	6.2	2.1	102	19	3.8	1418	40	-18.51	3.07	-2.8	-0.5	13.902	1	0.0263158	2	-0.974211	1	6.26531	2	3	2.64286	3			-0.783784	1	-1	1
11	1	0	2020-02-29	2020-02-27	37	0	0	0	23.7	9	1125	8.26			2037	0.7	1.01	15.2			5.24		3.14	45.8	0.3	2.6	1991.2	-2037	0.71	4.23	-1.9	-0.7	43.476	2	-1	1	2.36667	3	4.18812	1	4.7	-1	1	1	3	-0.25	2	34.3333	3
12	0	0	2021-07-27	2021-07-25	32	1	0	1	21.9	11	1370	9.93	6.9	4.4	3320	2.5	1.42	10.7	2840	53.4	8.25	16.6	1.44	67	0.34	6.2	3253	-480	1.08	6.83	-3.7	50.9	48.5522	2	-0.144578	1	3.17647	3	4.80986	1	4.7	0.0927835	2	0.675841	2	-0.567568	2	54.5	3
14	0	0	2021-11-04	2021-11-02	32	0	0	0	24.2	11	521	6.36	10.5	0.7	1010	1	0.34		1130	1.5	4.44	13.8	1.87	207	0.39		803	120	-0.05	4.1	1	0.5	3.87923	1	0.118812	2	-0.128205	1	12.0588	3	4.9	0.838235	2	-0.388889	1	-0.516129	2	-0.466667	1
15	0	0	2021-07-28	2021-07-26	37	0	0	0	19.5	10	762	4.49		2.3	1771	0.6	0.51	6.9	1870	24.7	2.93	11.5	2.47	99.2	1.76	2.1	1671.8	99	-1.25	2.42	-1.5	24.1	16.8528	1	0.0559006	2	-0.710227	1	4.7451	1	5.2	-1	1			-0.735294	1	-1	1
16	0	0	2021-12-06	2021-12-05	37	0	0	0	19.5	10	2220	4.3			2100	2.9	1.36		2220	14.6	4.3	16.5	2.47	99.2	1.76	2.1	2000.8	120	-0.4	2.94	0.8	11.7	20.1694	1	0.0571429	2	-0.227273	1	2.16176	1	5.2	1	3			-0.473684	2	-0.6	1
17	1	0	2021-12-16	2021-12-14	31	1	0	0	17.9	9	261	9.02	10.5	0.6	1060	1.1	1.06		799	1	5.44	13.5	1.56	71.4	8.21	2.1	988.6	-261	-7.15	4.38	-1	-0.1	13.8459	1	-0.246226	1	-0.870889	1	4.13208	1	5.3	-1	1			-0.75	1	-1	1
19	0	0	2019-12-30	2019-12-28	35	2	0	2	16	8					2392	1	1.1						1.88	76	0.5	5.4	2316	-2392	0.6	-1.1	-4.4	-1	30.4737	2	-1	1	1.2	3	-1	1	5.4	0.084507	2	0.472603	2	-0.518519	2	18.2308	3
20	0	0	2020-03-20	2020-03-18	35	2	0	2	16	14	955	10.1		2.5	2755	1.5	1.28		2970	25.8	6.52		1.88	76	0.5	5.4	2679	215	0.78	5.24	-3.9	24.3	35.25	2	0.0780399	2	1.56	3	4.09375	1	5.4	0.22973	2	0.576744	2	-0.375	2	24	3
21	0	0	2020-02-07	2020-02-05	40	0	0	0	18.3	10					727	0.8	0.9	20.4	740		5.7		1.38	13.8	0.8	3.7	713.2	13	0.1	4.8	-2.9	-0.8	51.6812	2	0.0178817	2	0.125	2	5.33333	2	5.6	-1	1			-0.869565	1	-0.333333	1
22	1	0	2021-09-22	2021-09-20	31	2	0	1	24.4	7	52.5	6.57	15.5	0.5	94.1	0.5	0.57		120	0.8	3.41	16.8	3.19	53.4	0.51	1.6	40.7	25.9	0.06	2.84	-1.1	0.3	0.762172	1	0.275239	3	0.117647	2	4.98246	1	5.9	-1	1	1	3	-0.678571	1	-0.333333	1
23	0	0	2021-12-18	2021-12-16	31	2	0	1	24.4	7	1360	16.4	7.8	0.9	2270	2	0.62		2850	2.4	6.97	11.1	3.19	53.4	0.51	1.6	2216.6	580	0.11	6.35	0.4	0.4	41.5094	2	0.255507	3	0.215686	2	10.2419	3	5.9	-1	1	1	3	-0.72	1	-0.285714	1
25	0	0	2020-01-10	2020-01-08	33	0	0	0	21.9	11					3523	1.2	1.6						3.46	17.4	0.5	2.4	3505.6	-3523	1.1	-1.6	-1.2	-1.2	201.471	3	-1	1	2.2	3	-1	1	5.9	-0.104651	1	0.757098	2	-0.321429	2	31.8421	3
26	0	0	2020-03-31	2020-03-29	37	0	0	0	19.6	7	1744	13.2		2.2	3135	1.5	1.76		3896	31.6	10.7		1.62	71.2	1.2	2.9	3063.8	761	0.56	8.94	-1.4	30.1	43.0309	2	0.242743	3	0.466667	2	5.07955	2	6	0.139535	2	-0.113636	1	-0.653846	1	-0.111111	1
28	0	0	2020-04-17	2020-04-15	28	0	0	0	18.7	14	767	0.8	4.4	3.79	1530	1.7	0.69	9.4	1710	3.7	2.57	6.9	2.52	41	0.7	2.6	1489	180	-0.01	1.88	-0.9	2	36.3171	2	0.117647	2	-0.0142857	1	2.72464	1	6	-1	1			-0.75	1	-0.4	1
29	0	0	2020-09-30	2020-09-28	36	2	0	2	19.5	8	251	3.91	11.6	0.4	836	1.4	0.58		781	1	1.95	15.3	1.18	90.6	0.29	1.5	745.4	-55	0.29	1.37	-0.1	-0.4	8.22737	1	-0.0657895	1	1	3	2.36207	1	6.1	-1	1	1	3	-0.190476	2	14.2353	3
31	1	0	2021-01-04	2021-01-02	26	0	0	0	20.8	8	277	2.52		0.5	549	0.8	0.38		666	1.1	2.2		1.18	59.8	0.26	1.5	489.2	117	0.12	1.82	-0.7	0.3	8.1806	1	0.213115	3	0.461538	2	4.78947	1	6.2	-1	1			-0.714286	1	-0.166667	1
32	0	0	2021-06-18	2021-06-16	27	0	0	0	20.8	8					1310	1.2	0.45	16.4	1310	25.1	2.4	18.3	1.18	59.8	0.26	1.5	1250.2	0	0.19	1.95	-0.3	23.9	20.9064	1	0	2	0.730769	2	4.33333	1	6.2	0.566667	2	-0.362319	1	-0.346154	2	1.17647	2
37	1	0	2021-12-12	2021-12-10	33	1	0	1	23.1	12					1550	5	0.64		1470	57.2	4.69	20.1	3.43	30.6	0.52	3.1	1519.4	-80	0.12	4.05	1.9	52.2	49.6536	2	-0.0516129	1	0.230769	2	6.32812	2	6.3	-1	1	1	3	-0.0666667	2	-0.285714	1
38	0	0	2021-12-20	2021-12-18	34	1	0	1	21.4	14	478	7.05	6	5	1630	2.5	0.54		1730	71.8	3.85	20.2	2.07	24.9	0.89	3.6	1605.1	100	-0.35	3.31	-1.1	69.3	64.4618	3	0.0613497	2	-0.393258	1	6.12963	2	6.3	-1	1			-0.5	2	-1	1
41	0	0	2021-12-10	2021-12-08	30	1	0	1	17.1	11	1690	13.1	10.9	0.5	4460	1.2	1.42		4280	1.2	7.42	16.6	3.86	44	0.58	1.8	4416	-180	0.84	6	-0.6	0	100.364	3	-0.0403587	1	1.44828	3	4.22535	1	6.4	1.2766	3	0.355422	2	-0.596774	2	20.36	3
42	0	0	2020-01-18	2020-01-16	34	2	1	1	20	13					3783	0.5	2.3	15.2					2.48	66.5	0.6	3.1	3716.5	-3783	1.7	-2.3	-2.6	-0.5	55.8872	2	-1	1	2.83333	3	-1	1	6.4	0.1875	2	0.652015	2	-0.655172	1	43.3	3
43	1	0	2020-07-04	2020-07-02	29	0	0	0	20.8	13	1480	14.4		0.2	3320	1.1	0.95		3210	0.2	7.46		2.51	42.6	0.6	2.3	3277.4	-110	0.35	6.51	-1.2	-0.9	76.9343	3	-0.0331325	1	0.583333	2	6.85263	2	6.4	-1	1	1	3	0.25	3	0.2	2
44	0	0	2020-07-26	2020-07-24	37	0	0	0	24.2	12	415	3.48	5.9	0.6	1335	2.1	0.44	11.5	1030	0.2	1.75	8.6	1.4	40.6	0.2	3.2	1294.4	-305	0.24	1.31	-1.1	-1.9	31.8818	2	-0.228464	1	1.2	3	2.97727	1	6.5	0.349398	2	0.585185	2	-0.0833333	2	18.4545	3
47	0	0	2020-05-04	2020-05-02	33	1	0	1	21.9	9	754	10		0.2	2760	1	0.97		2317	0.4	5.04		1.72	26.7	1.2	2.9	2733.3	-443	-0.23	4.07	-1.9	-0.6	102.371	3	-0.160507	1	-0.191667	1	4.19588	1	6.6	-1	1			-0.375	2	-0.5	1
49	0	0	2020-06-16	2020-06-14	27	1	0	1	20.4	14	1540	17.5		0.2	2630	0.8	1.72		2780	0.4	10.1		2.37	22.9	0.96	2	2607.1	150	0.76	8.38	-1.2	-0.4	113.847	3	0.0570342	2	0.791667	2	4.87209	1	6.7	0.7875	2	0.251309	2	0.48	3	5.32432	2
52	1	0	2020-04-03	2020-04-01	41	1	0	1	22.9	12	491	3.55		0.9	1240	1.8	0.59		1233	2.5	2.33		2.12	36.5	0.5	1.5	1203.5	-7	0.09	1.74	0.3	0.7	32.9726	2	-0.00564516	1	0.18	2	2.94915	1	6.8	-1	1	1	3	-0.887097	1	-0.285714	1
56	0	0	2020-05-29	2020-05-27	36	2	0	2	24.4	8	284	2.2	7.1	0.4	655	0.9	0.33	12.6	815	1.3	1.09		1.18	59.8	0.42	1.4	595.2	160	-0.09	0.76	-0.5	0.4	9.95318	1	0.244275	3	-0.214286	1	2.30303	1	7.2	2.27419	3	-0.201183	1	0.357143	3	-0.526316	1
61	0	0	2020-02-27	2020-02-25	41	2	0	1	18.8	10					2140	1	1.1	14.6	2261	0.4	8.23		3.84	47.8	0.3	1.9	2092.2	121	0.8	7.13	-0.9	-0.6	43.7699	2	0.0565421	2	2.66667	3	6.48182	2	7.3	-1	1	1	3	-0.642857	1	34.4667	3
62	0	0	2021-08-05	2021-08-03	31	3	0	3	22.5	7	172	3.75	9.7	4.3	668	1.5	0.76	9.1	585	37.5	2.82	21.5	1.54	49.6	0.69	2.4	618.4	-83	0.07	2.06	-0.9	36	12.4677	1	-0.124251	1	0.101449	2	2.71053	1	7.4	0.511905	2	-0.245098	1	-0.26087	2	-0.352941	1
63	0	0	2020-06-22	2020-06-20	35	1	0	1	20	11	346	2.76	5.8	0.3	675	0.8	0.24	12.8	797	1.3	3.14	9	1.44	52.9	0.31	2.2	622.1	122	-0.07	2.9	-1.4	0.5	11.7599	1	0.180741	3	-0.225806	1	12.0833	3	7.4	1.16854	3	-0.519685	1	-0.190476	2	-0.529412	1
65	0	0	2019-12-13	2019-12-11	29	1	0	0	25.2	8					2106	0.8	0.6						2.72	27.9	0.5	3.2	2078.1	-2106	0.1	-0.6	-2.4	-0.8	74.4839	3	-1	1	0.2	2	-1	1	7.5	-1	1	1	3	-0.766667	1	-0.285714	1
76	0	0	2020-10-01	2020-09-29	24	0	0	0	25.7	8	376	6.54		1.3	680	0.7	0.81		947	14.5	3.64		1.75	50.7	1.05	1.6	629.3	267	-0.24	2.83	-0.9	13.8	12.4122	1	0.392647	3	-0.228571	1	3.49383	1	8	-1	1			-0.655172	1	-0.6	1
78	0	0	2021-01-31	2021-01-29	33	2	0	2	18.2	10	1840	9.31	8.4	2.7	4530	3.7	1.59	14.3	4630	23.4	7.52	19.1	1.45	71.1	0.81	2.5	4458.9	100	0.78	5.93	1.2	19.7	62.7131	3	0.0220751	2	0.962963	2	3.72956	1	8	0.0408163	2	0.613636	2	-0.315789	2	12.4615	3
79	0	0	2020-11-22	2020-11-20	26	0	0	0	20.1	11	699	3.64	8.2	3.3	1400	1	0.51	9.5	1680	44.3	1.78	27.3	3.22	57.4	0.72	2.9	1342.6	280	-0.21	1.27	-1.9	43.3	23.3902	1	0.2	3	-0.291667	1	2.4902	1	8	-1	1			-0.4	2	-0.833333	1
81	0	0	2020-09-01	2020-08-30	35	1	0	1	25.7	8	605	7.54	9.5	0.2	1310	16.7	0.64	0.5	1430	0.4	1.99	13.8	1.86	33.9	0.74	1.6	1276.1	120	-0.1	1.35	15.1	-16.3	37.6431	2	0.0916031	2	-0.135135	1	2.10938	1	8.1	-1	1	1	3	-0.215686	2	-0.475	1
82	0	0	2020-04-21	2020-04-19	32	0	0	0	21.1	8	510		4.6	0.2	1400	2	0.49	9.6	1310	0.5	2.9	6.9	2.71	51.6	0.61	3.1	1348.4	-90	-0.12	2.41	-1.1	-1.5	26.1318	1	-0.0642857	1	-0.196721	1	4.91837	1	8.1	0.833333	2	-0.534884	1	-0.6	1	-0.5	1
83	0	0	2021-01-31	2021-01-29	34	3	1	1	20.8	9	1210	10.6	8.6	0.5	2840	1.4	0.43	16.8	3630	1.2	5.72	12	1.98	41.9	0.46	4.6	2798.1	790	-0.03	5.29	-3.2	-0.2	66.7804	3	0.278169	3	-0.0652174	1	12.3023	3	8.1	0.903226	2	-0.45082	1	-0.689655	1	-0.444444	1
84	0	0	2020-06-27	2020-06-25	30	0	0	0	22.7	9	940	11.9	9.4	0.4	2220	1.5	1.08	15.9	2480	4.87	4.87	11.8	2.22	51.2	0.72	1.7	2168.8	260	0.36	3.79	-0.2	3.37	42.3594	2	0.117117	2	0.5	2	3.50926	1	8.1	-1	1			2.22222	3	-0.0344828	1
85	0	0	2021-05-15	2021-05-13	31	1	0	1	22.8	11					3350	1.3	0.74	14.7	3780	0.8	4.75	8.7	1.31	53.3	0.59	2.1	3296.7	430	0.15	4.01	-0.8	-0.5	61.8518	3	0.128358	2	0.254237	2	5.41892	2	8.1	-1	1	1	3	-0.444444	2	-0.266667	1
86	0	0	2021-05-13	2021-05-11	26	0	0	0	19.5	10	1161	14.5	10.3	0.6	2390	1.2	0.84	24.3	2560	0.8	8.89	46.5	2.6	83.6	0.46	3.7	2306.4	170	0.38	8.05	-2.5	-0.4	27.5885	1	0.0711297	2	0.826087	2	9.58333	2	8.2	4.77778	3	-0.714286	1	-0.75	1	9	2
87	0	0	2021-06-22	2021-06-20	31	3	1	2	23.6	8	1270	8.38	8.8	3.7	2790	2.2	0.74	11.2	2300	42.8	3.98	27	2.61	41.2	0.44	2.4	2748.8	-490	0.3	3.24	-0.2	40.6	66.7184	3	-0.175627	1	0.681818	2	4.37838	1	8.3	0.75	2			-0.357143	2	0.444444	2
88	0	0	2021-06-27	2021-06-25	33	1	0	1	20	11	2270	6.71	6	1.4	1480	1	0.86	9.6	2480	2.7	4.54	9.6	3.42	56.4	0.4	3.6	1423.6	1000	0.46	3.68	-2.6	1.7	25.2411	1	0.675676	3	1.15	3	4.27907	1	8.3	-1	1			-0.722222	1	16.2	3
89	0	0	2021-05-05	2021-05-03	38	5	1	3	24.9	11	1340	6.51	7.5	0.4	2080	1.7	0.49	12.7	3015	1.1	3.01	10.2	1.19	42	0.61	2.3	2038	935	-0.12	2.52	-0.6	-0.6	48.5238	2	0.449519	3	-0.196721	1	5.14286	2	8.4	-1	1			-0.6	1	-0.5	1
90	0	0	2021-07-01	2021-06-29	36	4	0	0	21.3	8	253	6.87	3.8	0.3	531	0.5	0.54	8.6	837	0.8	4.13	6.1	1.85	54.2	0.39	2.4	476.8	306	0.15	3.59	-1.9	0.3	8.79705	1	0.576271	3	0.384615	2	6.64815	2	8.5	1.41667	3	-0.526316	1	-0.615385	1	-0.2	1
91	0	0	2020-07-21	2020-07-19	33	0	0	0	19.5	9	771	4.01		0.3	1350	0.6	0.51		1700	0.7	1.98		1.17	45.7	0.51	1.8	1304.3	350	0	1.47	-1.2	0.1	28.5405	1	0.259259	3	0	2	2.88235	1	8.5	0.910256	2	-0.366972	1	-0.634146	1	-0.4	1
92	0	0	2021-06-25	2021-06-23	38	1	0	1	19.6	7	2052	21.2	8.9	4.6	3070	1.9	0.88	11.8	5238	67.3	11.5	17.9	3.04	54.4	0.49	7.1	3015.6	2168	0.39	10.62	-5.2	65.4	55.4338	2	0.706189	3	0.795918	2	12.0682	3	8.6	5.68182	3	0.174157	2	0.555556	3	5.78571	2
95	0	0	2021-06-11	2021-06-09	26	0	0	0	20.1	11					276	1.9	0.35	7.7	540	62.4	0.69	31.7	3.22	41	0.54	2.8	235	264	-0.19	0.34	-0.9	60.5	5.73171	1	0.956522	3	-0.351852	1	0.971429	1	8.6	-0.938272	1	0.963768	2	9.4375	3	-0.976048	1
96	1	0	2020-06-21	2020-06-19	34	0	0	0	19.3	12	377	5.86		0.3	1070	0.5	0.69		1070	0.4	3.82		1.15	75.8	0.44	3.4	994.2	0	0.25	3.13	-2.9	-0.1	13.1161	1	0	2	0.568182	2	4.53623	1	8.6	-1	1			-0.666667	1	0.166667	2
99	1	0	2021-04-12	2021-04-10	39	0	0	0	21.3	8	1030	7.43		0.4	2340	1.4	0.6	13.1	2370	0.9	4.17	8.7	2.17	30.9	0.34	3.2	2309.1	30	0.26	3.57	-1.8	-0.5	74.7282	3	0.0128205	2	0.764706	2	5.95	2	8.8	-1	1	1	3	0.380952	3	4.03448	2
100	0	0	2021-01-03	2021-01-01	29	0	0	0	18.8	10	499	6.62	12.5	0.5	1300	1.2	0.7	22.6	1160	1.1	3.63	17.4	1.98	45.4	0.23	4.2	1254.6	-140	0.47	2.93	-3	-0.1	27.6344	1	-0.107692	1	2.04348	3	4.18571	1	8.8	-1	1			-0.517241	2	29.7857	3
101	0	0	2021-04-06	2021-04-04	37	1	0	1	27.1	12	650	9.06		0.3	1610	0.5	0.79	17.4	1500	0.4	4.48	15.6	1.89	43	0.53	2.1	1567	-110	0.26	3.69	-1.6	-0.1	36.4419	2	-0.068323	1	0.490566	2	4.67089	1	8.8	1.56818	3	-0.298851	1	-0.714286	1	-0.0833333	1
102	0	0	2020-07-12	2020-07-10	31	0	0	0	21.6	12	1260	7.55		0.3	2330	1.8	0.98	17.3	2820	1	4.41	11.5	3.1	25.3	0.37	4.9	2304.7	490	0.61	3.43	-3.1	-0.8	91.0949	3	0.2103	3	1.64865	3	3.5	1	8.8	0.478723	2	0.750896	2	0.125	3	24.4722	3
104	0	0	2020-04-11	2020-04-09	27	3	1	2	17.7	11	473	4.59		0.2	1575	1.8	0.79		1595	0.3	4.39		1.38	62.7	0.8	3	1512.3	20	-0.01	3.6	-1.2	-1.5	24.1196	1	0.0126984	2	-0.0125	1	4.55696	1	8.9	2.14634	3	-0.34375	1	-0.444444	2	-0.4	1
107	0	0	2020-07-02	2020-06-30	37	0	0	0	19.6	7	1080	13.8		0.2	2410	1	1.44		2570	0.5	7.61		1.62	55.7	1.53	1.6	2354.3	160	-0.09	6.17	-0.6	-0.5	42.2675	2	0.06639	2	-0.0588235	1	4.28472	1	9.2	0.965909	2	-0.504348	1	-0.632653	1	-0.444444	1
108	0	0	2021-06-06	2021-06-04	20	0	0	0	15.6	11	1773	6.86	9.6	0.4	2160	0.9	1.3	17.7	3390	0.5	5.17	12.2	2.49	43.3	0.57	2.9	2116.7	1230	0.73	3.87	-2	-0.4	48.8845	2	0.569444	3	1.2807	3	2.97692	1	9.3	-1	1			-0.5625	2	19.7143	3
111	0	0	2021-01-09	2021-01-07	39	1	0	1	19.9	8	185	1.94	7.1	0.6	386	1	0.66	14.9	650	1.3	2.03	10.4	2.61	46	0.56	3.2	340	264	0.1	1.37	-2.2	0.3	7.3913	1	0.683938	3	0.178571	2	2.07576	1	9.4	0.78125	2	-0.341176	1	-0.52381	2	-0.3	1
112	0	0	2021-03-22	2021-03-20	40	1	0	1	19.9	8	499	2.32	13.9	8.6	873	3.6	0.42	13.9	1240	91.7	1.65	55.8	2.61	46	0.56	3.2	827	367	-0.14	1.23	0.4	88.1	17.9783	1	0.420389	3	-0.25	1	2.92857	1	9.4	-1	1			-0.521739	2	-0.818182	1
113	0	0	2021-08-06	2021-08-04	31	0	0	0	18.7	7	619	2.32	8.2	6.1	984	4.3	0.33	10.6	1350	51.4	1.76	26.6	1.23	53.9	0.37	3.5	930.1	366	-0.04	1.43	0.8	47.1	17.256	1	0.371951	3	-0.108108	1	4.33333	1	9.5	-1	1			-0.65625	1	-0.454545	1
114	0	0	2020-07-08	2020-07-06	31	2	1	0	20	10	979	12.6		0.2	2010	0.3	1.28		1950	0.2	6.66		1.5	39.3	0.33	2.3	1970.7	-60	0.95	5.38	-2	-0.1	50.145	2	-0.0298507	1	2.87879	3	4.20312	1	9.5	0.425	2	0.608247	2	-0.777778	1	53.625	3
117	0	0	2021-06-22	2021-06-20	30	2	1	1	20.3	11	646	3.89	9.2	4.9	2322	1.6	0.55	10.6	2313	88.8	2.53	32.7	2.46	42.6	0.69	3.7	2279.4	-9	-0.14	1.98	-2.1	87.2	53.507	2	-0.00387597	1	-0.202899	1	3.6	1	9.7	2.4	3	-0.645161	1	-0.736842	1	-0.5	1
118	0	0	2021-05-07	2021-05-05	31	1	0	1	21.4	8	509	2.53	6.2	2.9	1334	2.6	0.67	10.2	1010	35	2.12	26.4	3.33	25.9	1	3.8	1308.1	-324	-0.33	1.45	-1.2	32.4	50.5058	2	-0.242879	1	-0.33	1	2.16418	1	9.8	0.769231	2	-0.337209	1	-0.34375	2	-0.904762	1
120	0	0	2019-11-26	2019-11-24	39	2	1	1	24.7	7					1320	0.9	0.5						1.66	38.5	0.3	3.4	1281.5	-1320	0.2	-0.5	-2.5	-0.9	33.2857	2	-1	1	0.666667	2	-1	1	9.9	-1	1			-0.466667	2	0.375	2
1	1	1	2020-07-09	2020-07-07	35	0	0	0	19	10	2320	5.56	11.3	0.2	3010	1.1	0.45	21.1	3410	0.9	4.2	14.2	2.53	68.6	0.26	0.3	2941.4	400	0.19	3.75	0.8	-0.2	42.8776	2	0.13289	2	0.730769	2	8.33333	2	1.9	0.156627	2	0	2	-0.722222	1	1.7	2
3	1	1	2021-03-10	2021-03-08	26	0	0	0	25	7	1260	16.4	9.3	0.8	2130	1.4	1.49	14.7	2230	9.5	7	17.8	1.14	91.8	0.8	0.9	2038.2	100	0.69	5.51	0.5	8.1	22.2026	1	0.0469484	2	0.8625	2	3.69799	1	2.2	0.115789	2	0.601504	2	0.228571	3	10.9535	3
8	1	1	2021-01-13	2021-01-11	23	1	0	0	23.3	11	780	15.5	6.7	0.2	1530	1	0.78	12.9	1980	0.6	7.99	9.6	1.64	64.4	0.33	1.8	1465.6	450	0.45	7.21	-0.8	-0.4	22.7578	1	0.294118	3	1.36364	3	9.24359	2	4.1	1.64516	3	0.103825	2	-0.2	2	19.9167	3
9	1	1	2021-11-26	2021-11-24	28	1	0	1	20.5	14					4400	2.7	0.74		4790	52.8	8.31	20.4	3.17	40.9	0.52	4.2	4359.1	390	0.22	7.57	-1.5	50.1	106.579	3	0.0886364	2	0.423077	2	10.2297	3	4.2	0.75	2	-0.5	1	-0.565217	2	-0.2	1
10	1	1	2021-07-31	2021-07-29	28	0	0	0	18.5	11					9510	1.2	2.51	11.1	12330		14.8		3.92	108	1.49	4.3	9402	2820	1.02	12.29	-3.1	-1.2	87.0556	3	0.29653	3	0.684564	2	4.89641	1	4.3	-1	1	1	3			0.5	2
13	1	1	2020-04-17	2020-04-15	37	0	0	0	24.2	8	714	6.56	4.6	0.5	2250	2	0.7	8.4	2190	1.6	4.27	5.6	1.25	35.3	0.4	4.6	2214.7	-60	0.3	3.57	-2.6	-0.4	62.7394	3	-0.0266667	1	0.75	2	5.1	2	4.8	0.962963	2	-0.347458	1	-0.117647	2	2.24667	2
18	1	1	2020-12-05	2020-12-03	29	1	0	1	21.8	9	900	22	5.5	0.3	2900	1	1.3	10.4	2540	0.6	9.97	7.1	3.98	31.3	2.36	3.5	2868.7	-360	-1.06	8.67	-2.5	-0.4	91.6518	3	-0.124138	1	-0.449153	1	6.66923	2	5.3	2.23404	3			-0.730769	1	-1	1
24	1	1	2021-07-14	2021-07-12	29	1	0	0	18.7	8	1550	17.5	8.2	0.3	3810	1.2	1.14	11.5	4370	0.7	8.5	11.4	3.07	46.2	0.31	3	3763.8	560	0.83	7.36	-1.8	-0.5	81.4675	3	0.146982	2	2.67742	3	6.45614	2	5.9	0.326923	2	0.4	2	-0.714286	1	40.1667	3
27	1	1	2020-09-30	2020-09-28	29	0	0	0	18.7	9					2530	1	0.39	14.5	2420	0.8	8.4	9.5	2.52	41	0.7	2.6	2489	-110	-0.31	8.01	-1.6	-0.2	60.7073	3	-0.0434783	1	-0.442857	1	20.5385	3	6	1.5814	3			-0.72093	1	-1	1
30	1	1	2021-06-02	2021-05-31	32	1	0	0	18.7	7	1070	8.13	9.4	0.4	3260	1.9	0.56	20.3	3685	0.9	3.77	16.9	1.57	63.5	0.44	1.4	3196.5	425	0.12	3.21	0.5	-1	50.3386	2	0.130368	2	0.272727	2	5.73214	2	6.2	-1	1			-0.861111	1	-0.2	1
33	1	1	2021-08-05	2021-08-03	34	2	0	2	23.4	11	447	10.9	3.4	0.4	1160	0.7	0.56	9.4	1640	1.1	5.26	5.4	2.52	57.5	0.29	3.1	1102.5	480	0.27	4.7	-2.4	0.4	19.1739	1	0.413793	3	0.931034	2	8.39286	2	6.2	0.486842	2	0.5	2	-0.26087	2	12	3
34	1	1	2021-10-05	2021-10-03	34	0	0	0	20.2	12	966	18.3	6.5	0.2	1950	0.7	1		2720	0.5	14.7	10.1	2.29	56.2	1.09	3	1893.8	770	-0.09	13.7	-2.3	-0.2	33.6975	2	0.394872	3	-0.0825688	1	13.7	3	6.2	0.693333	2	-0.739726	1	-0.521739	2	-0.454545	1
35	1	1	2021-12-24	2021-12-22	34	0	0	0	20.2	12	1630	14.3	10	3.3	2820	2.3	1.64		2830	43.8	11.4	26.3	2.29	56.2	1.09	3	2763.8	10	0.55	9.76	-0.7	41.5	49.1779	2	0.0035461	2	0.504587	2	5.95122	2	6.2	-1	1	1	3	-0.615385	1	0	2
36	1	1	2020-04-17	2020-04-15	32	3	1	2	21.9	11	906	4.15		0.3	1900	2.4	0.52		2100	0.6	3.34		2.92	38.3	0.5	4.6	1861.7	200	0.02	2.82	-2.2	-1.8	48.6084	2	0.105263	2	0.04	2	5.42308	2	6.3	1.57471	3	0.0588235	2	-0.744186	1	-0.363636	1
39	1	1	2020-11-25	2020-11-23	30	0	0	0	20.8	9	1630	17.8	4.5	0.2	3950	0.7	0.79	9.5	5200	0.4	7.6	6.4	2.51	42.6	0.6	2.3	3907.4	1250	0.19	6.81	-1.6	-0.3	91.723	3	0.316456	3	0.316667	2	8.62025	2	6.4	-1	1			-0.852941	1	-0.2	1
40	1	1	2020-06-14	2020-06-12	39	4	1	3	20.4	11	1070	9.21	5.2	0.2	2710	1	0.75	11.4	2355	0.7	6.07	8.5	2.23	55.9	0.44	2.1	2654.1	-355	0.31	5.32	-1.1	-0.3	47.4794	2	-0.130996	1	0.704545	2	7.09333	2	6.4	0.0117647	2	-0.409836	1	-0.791667	1	0.6	2
45	1	1	2021-09-02	44439	23	0	0	0	21.6	13	922	18.4	3.9	0.5	2540	1.1	1.44		3590	0.6	12.7		2.09	49.2	1.27	3.2	2490.8	1050	0.17	11.26	-2.1	-0.5	50.626	2	0.413386	3	0.133858	2	7.81944	2	6.5	-1	1			-0.625	1	-0.333333	1
46	1	1	2021-07-06	2021-07-04	31	1	1	0	20.3	8	815	10.3	11.3	0.3	2295	0.7	0.98	24.1	2000	0.5	5.08	16	1.9	98.1	0.64	3.1	2196.9	-295	0.34	4.1	-2.4	-0.2	22.3945	1	-0.12854	1	0.53125	2	4.18367	1	6.6	-1	1	1	3	-0.153846	2	0.0909091	2
48	1	1	2021-11-20	2021-11-18	35	1	0	1	21.9	7	737	16.4	3.3	1.1	2260	2.7	1.57		2480	2.1	12.3	5.7	2.4	47.7	0.5	2.9	2212.3	220	1.07	10.73	-0.2	-0.6	46.3795	2	0.0973451	2	2.14	3	6.83439	2	6.7	-1	1	1	3	-0.658537	1	30.5	3
50	1	1	2020-10-13	2020-10-11	28	1	0	1	20.4	14	3890	30.4		0.2	5625	0.5	1.79		4360	0.3	21.2		2.37	22.9	0.96	2	5602.1	-1265	0.83	19.41	-1.5	-0.2	244.633	3	-0.224889	1	0.864583	2	10.8436	3	6.7	-1	1	1	3	-0.577836	2	11.5625	3
51	1	1	2021-02-02	2021-01-31	37	1	0	0	22.9	10	1430	13.1	5.7	0.5	2420	1.5	1.01	12.5	1530	0.8	6.48	9	3.43	32.6	0.55	3.1	2387.4	-890	0.46	5.47	-1.6	-0.7	73.2331	3	-0.367769	1	0.836364	2	5.41584	2	6.8	-1	1	1	3	0.612903	3	10.44	3
53	1	1	2021-11-03	2021-11-01	32	0	0	0	21.1	12	937	12.8	11.1	3.2	1760	1.5	1.05		1920	53.2	8.97	29.6	2.98	40.3	0.61	4.2	1719.7	160	0.44	7.92	-2.7	51.7	42.6725	2	0.0909091	2	0.721311	2	7.54286	2	6.9	0.72973	2	-0.422222	1	-0.636364	1	0.625	2
54	1	1	2021-06-12	2021-06-10	32	2	1	1	23.1	9	2367	5.57	5.2	1.6	4239	1.3	0.69	7.7	5499	25	6.01	14.6	3.4	27.9	0.46	2.7	4211.1	1260	0.23	5.32	-1.4	23.7	150.935	3	0.29724	3	0.5	2	7.71014	2	7.1	0.89011	2	-0.482759	1	-0.76	1	0	2
55	1	1	2021-03-14	2021-03-12	37	3	0	3	24.9	11	1150	17.5			3010	1.4	1.26		3440	43.1	7.91		2.47	27	0.5	2.9	2983	430	0.76	6.65	-1.5	41.7	110.481	3	0.142857	2	1.52	3	5.27778	2	7.1	0.591837	2	0.454545	2	-0.833333	1	22.5385	3
57	1	1	2021-10-08	2021-10-06	34	3	2	1	26.3	8	1000	8.04	7.7	0.7	2440	1.5	0.73		2320	1.1	7.37	11.6	1.78	36.6	0.3	2.7	2403.4	-120	0.43	6.64	-1.2	-0.4	65.6667	3	-0.0491803	1	1.43333	3	9.09589	2	7.2	-1	1			-0.482759	2	20.0667	3
58	1	1	2021-10-12	2021-10-10	28	2	0	2	19.6	11	536	19.2	8.9	0.3	1720	0.7	1.56		1280	0.5	12.9	12.8	2.76	67.7	0.74	6.2	1652.3	-440	0.82	11.34	-5.5	-0.2	24.4062	1	-0.255814	1	1.10811	3	7.26923	2	7.2	0.701149	2	0.270936	2	-0.4	2	14.7333	3
59	1	1	2021-10-26	2021-10-24	33	1	0	0	18.7	12					3060	1.7	0.54		3220	25.9	5.24	24	2.82	36.3	0.57	2.1	3023.7	160	-0.03	4.7	-0.4	24.2	83.2975	3	0.0522876	2	-0.0526316	1	8.7037	2	7.2	0.949153	2	-0.00877193	1	-0.6	1	-0.416667	1
60	1	1	2020-05-15	2020-05-13	34	1	1	0	20.8	13	1503	13.8	5.7	0.2	4326	1.6	1.04	13.2	4824	0.8	6.54	8.6	2.49	45.2	0.68	4	4280.8	498	0.36	5.5	-2.4	-0.8	94.708	3	0.115118	2	0.529412	2	5.28846	2	7.2	-1	1	1	3	-0.416667	2	0.0714286	2
64	1	1	2021-12-16	2021-12-14	31	3	0	3	22.5	13	663	11.6	4.9	0.6	2010	1.4	1		1650	1.5	7.86	7.2	1.54	49.6	0.69	2.4	1960.4	-360	0.31	6.86	-1	0.1	39.5242	2	-0.179104	1	0.449275	2	6.86	2	7.4	10.1053	3	-0.485915	1	2.66667	3	-0.181818	1
66	1	1	2021-12-13	2021-12-11	31	1	0	0	20.5	12	824	19.8	6.8	0.6	1780	1.4	1.08		2990	1.8	13.4	10.7	1.9	43.1	0.86	1.8	1736.9	1210	0.22	12.32	-0.4	0.4	40.2993	2	0.679775	3	0.255814	2	11.4074	3	7.5	-1	1	1	3	-0.0689655	2	-0.222222	1
67	1	1	2020-12-17	2020-12-15	28	0	0	0	19.6	13	1350	18.1		0.2	3720	0.5	1		4120	0.4	11.9		2.33	38	0.51	3.6	3682	400	0.49	10.9	-3.1	-0.1	96.8947	3	0.107527	2	0.960784	2	10.9	3	7.5	0.0674157	2	0.40625	2	-0.578947	2	12.125	3
68	1	1	2021-04-28	2021-04-26	28	0	0	0	19.6	13					3070	2.2	0.74	11.9	3885	36	7.95	18.6	2.33	38	0.51	3.6	3032	815	0.23	7.21	-1.4	33.8	79.7895	3	0.265472	3	0.45098	2	9.74324	2	7.5	0.181818	2			-0.984615	1	-0.166667	1
69	1	1	2021-06-05	2021-06-03	26	0	0	0	15.6	14	3672	31.7	4.8	0.3	6615	1.1	2.44	12.7	8181	0.6	29.6	7.3	2.69	84.1	1.65	2.3	6530.9	1566	0.79	27.16	-1.2	-0.5	77.6564	3	0.236735	3	0.478788	2	11.1311	3	7.5	-1	1	1	3	-0.47619	2	-0.0909091	1
70	1	1	2021-12-01	2021-11-29	29	1	0	1	23.4	14	1210	13.6	7.1	1.5	3140	1.4	0.85		3200	44.1	10.6	21.1	3.62	35.4	0.38	4.1	3104.6	60	0.47	9.75	-2.7	42.7	87.7006	3	0.0191083	2	1.23684	3	11.4706	3	7.5	-1	1	1	3	-0.357143	2	18.5556	3
71	1	1	2021-04-09	2021-04-07	30	2	0	0	23.8	7	948	9.15	8	1.6	3550	1.7	0.79	11.3	2880	22.1	5.75	22.6	1.32	15.6	0.54	2.3	3534.4	-670	0.25	4.96	-0.6	20.4	226.564	3	-0.188732	1	0.462963	2	6.27848	2	7.6	1.07407	3	-0.4	1	-0.695652	1	-0.142857	1
72	1	1	2021-05-19	2021-05-17	38	0	0	0	23.9	8	664	13.9	6.6	0.5	1629	1.5	0.74	14.9	1440	0.9	6.81	10.9	2.84	39.9	0.62	4.1	1589.1	-189	0.12	6.07	-2.6	-0.6	39.8271	2	-0.116022	1	0.193548	2	8.2027	2	7.8	2.65152	3	-0.50625	1	-0.774194	1	-0.285714	1
73	1	1	2021-09-17	2021-09-15	33	3	1	1	22.7	12	1220	8.95	8.5	1.8	2580	1.6	1.43		2610	20.1	7.52	19	1.77	25	0.48	3.79	2555	30	0.95	6.09	-2.19	18.5	102.2	3	0.0116279	2	1.97917	3	4.25874	1	7.81	-1	1	1	3	-0.305556	2	27.72	3
74	1	1	2021-10-13	2021-10-11	37	2	1	1	21.5	8	965	11.2	6.6	0.2	1870	0.7	0.85		2360	0.5	7.18	9.6	2.43	41.4	1.11	2.5	1828.6	490	-0.26	6.33	-1.8	-0.2	44.1691	2	0.262032	3	-0.234234	1	7.44706	2	7.9	0.185185	2	-0.391304	1	-0.354839	2	-0.75	1
75	1	1	2021-01-07	2021-01-05	33	1	0	1	21.4	13	1400	9.23		0.2	2540	0.6	0.77		2840	0.5	6.77		2.42	37.4	0.46	2.1	2502.6	300	0.31	6	-1.5	-0.1	66.9144	3	0.11811	2	0.673913	2	7.79221	2	7.9	-1	1			0.2	3	0.388889	2
77	1	1	2020-06-30	2020-06-28	34	2	0	1	27.9	9	699	12.6		0.2	1970	0.6	1.13		1610	0.4	6.21		1.4	46.8	0.7	1.6	1923.2	-360	0.43	5.08	-1	-0.2	41.094	2	-0.182741	1	0.614286	2	4.49558	1	8	-1	1	1	3	-0.222222	2	0.285714	2
80	1	1	2021-07-29	2021-07-27	32	0	0	0	16.2	14	369	8.8	9.4	2.1	1230	0.8	0.93	11.4	1110	43.7	6.64	29.1	2.35	54.4	0.55	3.6	1175.6	-120	0.38	5.71	-2.8	42.9	21.6103	1	-0.097561	1	0.690909	2	6.13978	2	8	0.516129	2	-0.740741	1	-0.774194	1	0.571429	2
93	1	1	2021-06-09	2021-06-07	32	1	0	0	29.1	10	1440	6.22	6.1	0.5	3159	0.9	0.53	9.8	3375	0.8	5.57	8.8	1.64	36.3	0.47	2.6	3122.7	216	0.06	5.04	-1.7	-0.1	86.0248	3	0.0683761	2	0.12766	2	9.50943	2	8.6	1.96341	3	0.477419	2	-0.675676	1	-0.333333	1
94	1	1	2021-09-15	2021-09-13	26	0	0	0	20.1	11					4460	0.9	1.92		4720	0.6	10.6	11.9	2.45	41	0.54	2.8	4419	260	1.38	8.68	-1.9	-0.3	107.78	3	0.058296	2	2.55556	3	4.52083	1	8.6	0.372093	2	0.340782	2	-0.732394	1	34.4211	3
97	1	1	2021-05-09	2021-05-07	28	0	0	0	18.3	11	911	7.69	14.8	0.4	1230	1.1	1.12	22.4	1830	0.7	5.16	23.8	1.54	103	0.74	4.3	1127	600	0.38	4.04	-3.2	-0.4	10.9417	1	0.487805	3	0.513514	2	3.60714	1	8.7	-1	1	1	3	-0.333333	2	0	2
98	1	1	2021-06-13	2021-06-11	28	0	0	0	18.6	14	815	5.28	8	1.7	2070	1.5	1.01	14.8	2817	23.6	5.12	20.3	3.06	33.5	0.57	2.5	2036.5	747	0.44	4.11	-1	22.1	60.791	3	0.36087	3	0.77193	2	4.06931	1	8.7	4.74074	3	-0.47619	1	-0.1	2	4.55556	2
103	1	1	2020-08-29	2020-08-27	36	1	0	0	20.1	10					2730	1.7	0.91	19.3	3340	0.8	6.16	12.7	3.78	52.8	0.53	2.1	2677.2	610	0.38	5.25	-0.4	-0.9	50.7045	2	0.223443	3	0.716981	2	5.76923	2	8.9	-1	1	1	3	-0.6875	1	0.6	2
105	1	1	2021-08-12	2021-08-10	32	0	0	0	25.8	13	725	15.9	7.1	0.8	1740	0.8	0.74	9.5	2040	10.5	10.5	16	2.99	44	0.75	1.9	1696	300	-0.01	9.76	-1.1	9.7	38.5455	2	0.172414	3	-0.0133333	1	13.1892	3	8.9	0.962264	2	-0.464789	1	-0.714286	1	-0.4	1
106	1	1	2021-01-07	2021-01-05	32	1	0	0	20	11	1910	19	7.9	0.3	4690	0.6	0.48	17.2	5250	0.6	8.02	11.6	3.55	117	0.51	2.5	4573	560	-0.03	7.54	-1.9	0	39.0855	2	0.119403	2	-0.0588235	1	15.7083	3	9.1	0.484375	2	-0.484375	1	-0.695652	1	-0.428571	1
109	1	1	2021-04-20	2021-04-18	40	3	0	2	25.3	7					3550	2.6	0.7	12.1	3650	60.2	3.77	31.5	1.11	41.7	0.51	3.5	3508.3	100	0.19	3.07	-0.9	57.6	84.1319	3	0.028169	2	0.372549	2	4.38571	1	9.4	0.977273	2	-0.115385	1	-0.761905	1	-0.2	1
110	1	1	2021-12-21	2021-12-19	37	7	1	5	24	7	1360	12.2	6.6	1.2	3920	4	1.6		3750	2.1	9.18	8.3	2.98	31.2	0.98	5.1	3888.8	-170	0.62	7.58	-1.1	-1.9	124.641	3	-0.0433673	1	0.632653	2	4.7375	1	9.4	0.585106	2	-0.432692	1	-0.6875	1	0.3	2
115	1	1	2021-11-14	2021-11-12	35	0	0	0	24.4	11					3400	1	0.55		4100	1	9.36	8.3	2.4	40.3	0.26	2.6	3359.7	700	0.29	8.81	-1.6	0	83.3672	3	0.205882	3	1.11538	3	16.0182	3	9.6	0.586667	2	0.360215	2	-0.388889	2	15.3636	3
116	1	1	2021-11-28	2021-11-26	35	4	0	4	21.1	11	955	7.4	7.6	0.6	1870	1.1	0.47		2040	1.2	4.48	10.3	2.46	50.9	0.62	1.3	1819.1	170	-0.15	4.01	-0.2	0.1	35.7387	2	0.0909091	2	-0.241935	1	8.53191	2	9.6	-1	1			-0.478261	2	-0.75	1
119	1	1	2021-07-16	2021-07-14	37	2	0	2	22.4	11	344	5.83	12.6	4.2	728	1.3	0.75	15.6	1050	30.6	6.7	28.6	3.36	37.2	0.3	7.8	690.8	322	0.45	5.95	-6.5	29.3	18.5699	1	0.442308	3	1.5	3	7.93333	2	9.8	0.287234	2	0.615873	2	-0.257143	2	22.1538	3
121	1	1	2021-07-15	2021-07-13	35	0	0	0	19.5	14	1290	22.4	4	0.3	2790	0.6	1.49	11.7	3790	0.5	11.5		3.19	210	1.43	39	2580	1000	0.06	10.01	-38.4	-0.1	12.2857	1	0.358423	3	0.041958	2	6.71812	2	9.9	0.488636	2	-0.505747	1	-0.5625	2	-0.357143	1
[truncated: 32 more columns]
